# Supplementary material for: Comparative Genomics of X-linked Muscular Dystrophies: The Golden Retriever Model
Source: PubMed Central journal article supplement (PMC3763684; doi:10.2174/13892029113149990004), 2013-08
Supplement: CG-14-330_SD1.pdf [file CG-14-330_SD1.pdf]

# Supplementary Material

Unconserved 0 1 2 3 4 5 6 7 8 9 10 Conserved

|             |                |                |                |                |             |
|-------------|----------------|----------------|----------------|----------------|-------------|
|             | ..... 10 ..... | ..... 20 ..... | ..... 30 ..... | ..... 40 ..... | ..... 50    |
| human       | MLWWEIVEDC     | YEREDVQKKT     | FTKWVNAQFS     | KFGKQHIENL     | FSDLQDGRRL  |
| mouse       | MLWWEIVEDC     | YEREDVQKKT     | FTKWINAQFS     | KFGKQHIDNL     | FSDLQDGKRL  |
| dog         | MLWWEIVEDC     | YEREDVQKKT     | FTKWVNAQFS     | KFGKQHIENL     | FSDLQDGRRL  |
| Consistency | *****          | *****          | ***9***        | *****7**       | *****7**    |
|             | ..... 60 ..... | ..... 70 ..... | ..... 80 ..... | ..... 90 ..... | ..... 100   |
| human       | LDLLEGLTGQ     | KLPKEKGSTR     | VHALNNVKA      | LRVLQNNNVD     | LVNIGSTDIV  |
| mouse       | LDLLEGLTGQ     | KLPKEKGSTR     | VHALNNVKA      | LRVLQKNNVD     | LVNIGSTDIV  |
| dog         | LDLLEGLTGQ     | KLPKEKGSTR     | VHALNNVKA      | LRVLQKNNVD     | LVNIGSTDIV  |
| Consistency | *****          | *****          | *****          | *****6****     | *****       |
|             | ..... 110..... | ..... 120..... | ..... 130..... | ..... 140..... | ..... 150   |
| human       | DGNHKLTLGL     | IWNIIILHWQV    | KNVMKNIMAG     | LQQTNSEKIL     | LSWVRQSTRN  |
| mouse       | DGNHKLTLGL     | IWNIIILHWQV    | KNVMKTIMAG     | LQQTNSEKIL     | LSWVRQSTRN  |
| dog         | DGNHKLTLGL     | IWNIIILHWQV    | KNVMKNIMAG     | LQQTNSEKIL     | LSWVRQSTRN  |
| Consistency | *****          | *****          | *****6****     | *****          | *****       |
|             | ..... 160..... | ..... 170..... | ..... 180..... | ..... 190..... | ..... 200   |
| human       | YPQVNVINFT     | TSWSDGLALN     | ALIHSHRPDL     | FDWNSVVCQQ     | SATQRLEHAF  |
| mouse       | YPQVNVINFT     | SSWSDGLALN     | ALIHSHRPDL     | FDWNSVVSQH     | SATQRLEHAF  |
| dog         | YPQVNVINFT     | TSWSDGLALN     | ALIHSHRPDL     | FDWNSVVCQQ     | SATQRLEHAF  |
| Consistency | *****          | 7*****         | *****          | *****5*5       | *****       |
|             | ..... 210..... | ..... 220..... | ..... 230..... | ..... 240..... | ..... 250   |
| human       | NIARYQLGIE     | KLLDPEDVDT     | TYPDKKSILM     | YITSLFQVLP     | QQVSIEAIQE  |
| mouse       | NIAKCYQLGIE    | KLLDPEDVAT     | TYPDKKSILM     | YITSLFQVLP     | QQVSIEAIQE  |
| dog         | NIAKYQLGIE     | KLLDPEDVAT     | TYPDKKSILM     | YITSLFQVLP     | QQVSIEAIQE  |
| Consistency | ***74****      | *****4*        | *****          | *****          | *****       |
|             | ..... 260..... | ..... 270..... | ..... 280..... | ..... 290..... | ..... 300   |
| human       | VEMLPRPPKV     | TKEEHFQL--     | HHQMHYSQQI     | TVSLAQGYER     | TSSPKPRFKS  |
| mouse       | VEMLPRTSSK     | VTREEHFQLH     | HQMHYSQQIT     | VSLAQGYEQT     | SSSPKPRFKS  |
| dog         | VEMLPRPSQV     | TREEHFQI-H     | HQMHYSQQIT     | VSLAQGYERA     | PSFPKPRFKS  |
| Consistency | *****5544      | 646*554303     | *564646*45     | 6555543453     | 4*4*****    |
|             | ..... 310..... | ..... 320..... | ..... 330..... | ..... 340..... | ..... 350   |
| human       | YAYTQAAYVT     | TSDPTRSPFP     | SQHLEAPEDK     | SFGSSLMESE     | VNLDRYQ TAL |
| mouse       | YAFTQAAYVA     | TSDSTQSPYP     | SQHLEAPRDK     | SLDSSLME TE    | VNLDSYQ TAL |
| dog         | YAYTQAAYVT     | TSDPTRSPLP     | SQHLETPE DK    | SFGRSLTETE     | ANLDSYQ TAL |
| Consistency | **7*****6      | ***5*7**4*     | *****6*6**     | *655**5*7*     | 6***5*****  |
|             | ..... 360..... | ..... 370..... | ..... 380..... | ..... 390..... | ..... 400   |
| human       | EEVLSWLLSA     | EDTLQAQGEI     | SNDVEEVK DQ    | FHTHEGYM MD    | LTAHQGRVGN  |
| mouse       | EEVLSWLLSA     | EDTLRAQGEI     | SNDVEEVKEQ     | FHAHEGFMD      | LTSHQGLVGN  |
| dog         | EEVLSWLLSA     | EDALQAQGEI     | SNDVEEVKEQ     | FHTHEGYM MD    | LTSHQGRVGN  |
| Consistency | *****          | **6*7*****     | *****4**7*     | **6***7***     | **7***4***  |

|             |                 |                 |                 |                 |            |
|-------------|-----------------|-----------------|-----------------|-----------------|------------|
|             | ..... 410 ..... | ..... 420 ..... | ..... 430 ..... | ..... 440 ..... | ..... 450  |
| human       | ILQLGSKLIG      | TGKLSEDEET      | EVQEQMNLN       | SRWECLRVAS      | MEKQSNLHRV |
| mouse       | VLQLGSQLVG      | KGKLSEDEEA      | EVQEQMNLN       | SRWECLRVAS      | MEKQSKLHKV |
| dog         | VLQLGSQLIG      | TGKLSEDEET      | EVQEQMNLN       | SRWECLRVAS      | MEKQSNLHKV |
| Consistency | 9*****7*9*      | 5*****6         | *****           | *****           | *****6**7* |

|             |                 |                 |                 |                 |            |
|-------------|-----------------|-----------------|-----------------|-----------------|------------|
|             | ..... 460 ..... | ..... 470 ..... | ..... 480 ..... | ..... 490 ..... | ..... 500  |
| human       | LMDLQNKLLK      | ELNDWLTKTE      | ERTRKMEEEP      | LGPDLLEDLKR     | QVQQHKVLQE |
| mouse       | LMDLQNKLLK      | ELDDWLTKTE      | ERTKKMEEEP      | FGPDLEDLKC      | QVQQHKVLQE |
| dog         | LMDLQNQQLK      | ELNDWLTKTE      | ERTRKMEKEP      | LGPDIEDLKR      | QVQQHKVLQE |
| Consistency | *****7**        | **6*****        | **7***7**       | 6***8***3       | *****      |

|             |                 |                 |                 |                 |            |
|-------------|-----------------|-----------------|-----------------|-----------------|------------|
|             | ..... 510 ..... | ..... 520 ..... | ..... 530 ..... | ..... 540 ..... | ..... 550  |
| human       | DLEQEQVRVN      | SLTHMVVVVD      | ESSGDHATAA      | LEEQLKVLGD      | RWANICRWTE |
| mouse       | DLEQEQVRVN      | SLTHMVVVVD      | ESSGDHATAA      | LEEQLKVLGD      | RWANICRWTE |
| dog         | DLEQEQVRVN      | SLTHMVVVVD      | ESSGDHATAA      | LEEQLKVLGD      | RWANICRWTE |
| Consistency | *****           | *****           | *****           | *****           | *****      |

|             |                 |                 |                 |                 |            |
|-------------|-----------------|-----------------|-----------------|-----------------|------------|
|             | ..... 560 ..... | ..... 570 ..... | ..... 580 ..... | ..... 590 ..... | ..... 600  |
| human       | DRVLLQDIL       | LKWQRLTEEQ      | CLFSAWLSEK      | EDAVNKIHTT      | GFKDQNEMLS |
| mouse       | DRWIVLQDIL      | LKWQHFTEEQ      | CLFSTWLSEK      | EDAMKNIQTS      | GFKDQNEMLS |
| dog         | DRVLLQDIL       | LKWQRFTEEQ      | CLFSAWLSEK      | EDAVNKIHTT      | GFKDQSEVLS |
| Consistency | **97*****       | ****56****      | ***6*****       | ***766*5*7      | *****7*78* |

|             |                 |                 |                 |                 |            |
|-------------|-----------------|-----------------|-----------------|-----------------|------------|
|             | ..... 610 ..... | ..... 620 ..... | ..... 630 ..... | ..... 640 ..... | ..... 650  |
| human       | SLQKLAFLKA      | DLEKQKQSMG      | KLYSLKQDLL      | STLKNKSVTQ      | KTEAWLDNFA |
| mouse       | SLHKISTLKI      | DLEKQKPTME      | KLSSLNQDLL      | SALKNKSVTQ      | KMEIWMENFA |
| dog         | NLQKLAFLKT      | DLEKQKQTMG      | KLCSLNQDLL      | SALKNTVVAH      | KMEAWLDNFA |
| Consistency | 7*5*876**3      | *****57*3       | **2**6****      | *6***55*65      | *5*5*87*** |

|             |                 |                 |                 |                 |             |
|-------------|-----------------|-----------------|-----------------|-----------------|-------------|
|             | ..... 660 ..... | ..... 670 ..... | ..... 680 ..... | ..... 690 ..... | ..... 700   |
| human       | RCWDNLVQKL      | EKSTAQISQA      | VTTTQPSLTQ      | TTVMETVTV       | TTREQILVKH  |
| mouse       | QRWDNLVQKL      | EKSSAQISQA      | VTTTQPSLTQ      | TTVMETVTMV      | TTREQIMVKH  |
| dog         | QRWDNLVQKL      | EKSSAQISQA      | VTTTQPSLTQ      | TTVMETVTMV      | TTREHILVKH  |
| Consistency | 73*****6**      | ***7*****       | *****           | *****5*         | *****5*8*** |

|             |                 |                 |                 |                 |             |
|-------------|-----------------|-----------------|-----------------|-----------------|-------------|
|             | ..... 710 ..... | ..... 720 ..... | ..... 730 ..... | ..... 740 ..... | ..... 750   |
| human       | AQEELPPPPP      | QKKRQITVDS      | EIRKRLDVDI      | TELHWSITRS      | EAVLQSPPEFA |
| mouse       | AQEELPPPPP      | QKKRQITVDS      | ELRKRDLVDI      | TELHWSITRS      | EAVLQSSPEFA |
| dog         | AQEELPPPPP      | QKKRQIIVDS      | EIRKRLDVDI      | TELHWSITRS      | EAVLQSPPEFA |
| Consistency | *****           | *****5**        | *8*****         | *****           | *****5***   |

|             |                 |                 |                 |                 |            |
|-------------|-----------------|-----------------|-----------------|-----------------|------------|
|             | ..... 760 ..... | ..... 770 ..... | ..... 780 ..... | ..... 790 ..... | ..... 800  |
| human       | IFRKEGNFSD      | LKEKVNAIER      | EKA EKFRKLQ     | DASRSAQALV      | EQMVNEGUNA |
| mouse       | VYRKEGNISD      | LQEKVNAIAR      | EKA EKFRKLQ     | DASRSAQALV      | EQMANEGUNA |
| dog         | IYRKEGNFSD      | LKEKVNAIER      | EKA EKFRKLQ     | DASRSAQALV      | EQMVNEGUNA |
| Consistency | 97*****6**      | *7*****5*       | *****           | *****           | ***6*****  |

|             |                 |                 |                 |                 |            |
|-------------|-----------------|-----------------|-----------------|-----------------|------------|
|             | ..... 810 ..... | ..... 820 ..... | ..... 830 ..... | ..... 840 ..... | ..... 850  |
| human       | DSIKQASEQL      | NSRWIEFCQL      | LSERLNWLEY      | QNNIIAFYNQ      | LQQLEQMTTT |
| mouse       | ESIRQASEQL      | NSRWTEFCQL      | LSERLNWLEY      | QTNIIITFYNQ     | LQQLEQMTTT |
| dog         | DSIKQASEQL      | NSRWIEFCQL      | LSERLNWLEY      | QNNIIITFYNQ     | LQQLEQMTTT |
| Consistency | 7**7*****       | ****5*****      | ***7*****       | *6***6****      | *****      |

|             | 860               | 870                 | 880                 | 890                 | 900                 |
|-------------|-------------------|---------------------|---------------------|---------------------|---------------------|
| human       | AENW L K I Q P T  | T P S E P T A I K S | Q L K I C K D E V N | R L S G L Q P Q I E | R L K I Q S I A L K |
| mouse       | AEN L L K T Q S T | T L S E P T A I K S | Q L K I C K D E V N | R L S A L Q P Q I E | Q L K I Q S L Q L K |
| dog         | AENW L K T Q P T  | T T S E P T A I K S | Q L K I C K D E I N | R L S A L Q P Q I E | R L K I Q S I A L K |
| Consistency | ***4**5*5*        | *2*****             | *****9*             | ***6*****           | 7*****85**          |

|             | 910                 | 920                 | 930                 | 940                 | 950                 |
|-------------|---------------------|---------------------|---------------------|---------------------|---------------------|
| human       | E K G Q G P M F L D | A D F V A F T N H F | K Q V F S D V Q A R | E K E L Q T I F D T | L P P M R Y Q E T M |
| mouse       | E K G Q G P M F L D | A D F V A F T N H F | N H I F D G V R A K | E K E L Q T I F D T | L P P M R Y Q E T M |
| dog         | E K G Q G P M F L D | A D F V A F T N H F | N Q V F A D V Q A R | E K E L Q T I F D S | L P P M R Y Q E T M |
| Consistency | *****               | *****               | 659*45*7*7          | *****7              | *****               |

|             | 960                 | 970                 | 980                 | 990                 | 1000                |
|-------------|---------------------|---------------------|---------------------|---------------------|---------------------|
| human       | S A I R T W V Q Q S | E T K L S I P Q L S | V T D Y E I M E Q R | L G E L Q A L Q S S | L Q E Q Q S G L Y Y |
| mouse       | S S I R T W I Q Q S | E S K L S V P Y L S | V T E Y E I M E E R | L G K L Q A L Q S S | L K E Q Q N G F N Y |
| dog         | S T I L T W I Q Q S | E T K L S I P Q V T | V T E Y D I M E Q R | L G E L Q A L Q S S | L Q E Q Q N G L N Y |
| Consistency | *5*4**9***          | *7***9*577          | **7*7***7*          | **7*****            | *7***7*64*          |

|             | 1010                | 1020                | 1030                | 1040                | 1050                |
|-------------|---------------------|---------------------|---------------------|---------------------|---------------------|
| human       | L S T T V K E M S K | K A P - S E I S R K | Y Q S E F E E I E G | R W K K L S S Q L V | E H C Q K L E E Q M |
| mouse       | L S D T V K E M A K | K A P - S E I C Q K | Y L S E F E E I E G | H W K K L S S Q L V | E S C Q K L E E H M |
| dog         | L S T T V K E M S K | K A P L S D I S R K | Y Q S E F E E I E G | R W K K L S S Q L V | E H C Q K L E E Q M |
| Consistency | **5*****7*          | ***0*7*57*          | *4*****             | 5*****              | *5*****5*           |

|             | 1060                | 1070                | 1080                | 1090                | 1100                |
|-------------|---------------------|---------------------|---------------------|---------------------|---------------------|
| human       | N K L R K I Q N H I | Q T L K K W M A E V | D V F L K E E W P A | L G D S E I L K K Q | L K Q C R L L V S D |
| mouse       | N K L R K F Q N H I | K T L Q K W M A E V | D V F L K E E W P A | L G D A E I L K K Q | L K Q C R L L V G D |
| dog         | A K L R K I Q N H I | K T L K K W I T E V | D V F L K E E W P A | L G D S E I L K R Q | L K Q C R L L V N D |
| Consistency | 4*****6****         | 7**7**76**          | *****               | ***7***7*           | *****4*             |

|             | 1110                | 1120                | 1130                | 1140                | 1150                |
|-------------|---------------------|---------------------|---------------------|---------------------|---------------------|
| human       | I Q T I Q P S L N S | V N E G G Q K I K N | E A E P E F A S R L | E T E L K E L N T Q | W D H M C Q Q V Y A |
| mouse       | I Q T I Q P S L N S | V N E G G Q K I K S | E A E L E F A S R L | E T E L R E L N T Q | W D H I C R Q V Y T |
| dog         | I Q T I Q P S L N S | V N E G A Q K M K N | E A E P E F A G R L | E T E L R E L N T Q | W D Y M C R Q V Y A |
| Consistency | *****               | ***6**7*7           | ***4***6**          | ***7*****           | **67*7***6          |

|             | 1160                | 1170                | 1180                | 1190                | 1200                |
|-------------|---------------------|---------------------|---------------------|---------------------|---------------------|
| human       | R K E A L K G G L E | K T V S L Q K D L S | E M H E W M T Q A E | E E Y L E R D F E Y | K T P D E L Q K A V |
| mouse       | R K E A L K A G L D | K T V S L Q K D L S | E M H E W M T Q A E | E E Y L E R D F E Y | K T P D E L Q T A V |
| dog         | R K E A L K G G L D | K T V S L Q K D L S | E M H E W M T Q A E | E E Y L E R D F E Y | K T P D E L Q T A V |
| Consistency | *****6**7           | *****               | *****               | *****               | *****5**            |

|             | 1210                | 1220                | 1230                | 1240                | 1250                |
|-------------|---------------------|---------------------|---------------------|---------------------|---------------------|
| human       | E E M K R A K E E A | Q Q K E A K V K L L | T E S V N S V I A Q | A P P V A Q E A L K | K E L E T L T T N Y |
| mouse       | E E M K R A K E E A | L Q K E T K V K L L | T E T V N S V I A H | A P P S A Q E A L K | K E L E T L T T N Y |
| dog         | E E M K R A K E E A | Q Q K E A K V K L L | T E S V N S V I A Q | A P P A A Q E A L K | K E L D T L T T N Y |
| Consistency | *****               | 4***6*****          | **7*****5           | ***4*****           | ***7*****           |

|             | 1260                | 1270                | 1280                | 1290                | 1300                |
|-------------|---------------------|---------------------|---------------------|---------------------|---------------------|
| human       | Q W L C T R L N G K | C K T L E E V W A C | W H E L L S Y L E K | A N K W L N E V E F | K L K T T E N I P G |
| mouse       | Q W L C T R L N G K | C K T L E E V W A C | W H E L L S Y L E K | A N K W L N E V E L | K L K T M E N V P A |
| dog         | Q W L C T R L N G K | C K T L E E V W A C | W H E L L S Y L E K | A N K W L S E V E V | K L K T T E N I S G |
| Consistency | *****               | *****               | *****               | *****7***4          | ***5***956          |

|             | 1310                                                 | 1320                     | 1330                     | 1340       | 1350                     |
|-------------|------------------------------------------------------|--------------------------|--------------------------|------------|--------------------------|
| human       | GAE <sup>5</sup> E <sup>5</sup> I <sup>5</sup> SEVLD | SL <sup>4</sup> ENLMRHSE | DNP <sup>7</sup> NQIRILA | QTLTDGGVMD | ELINEELET <sup>8</sup> F |
| mouse       | GPEEITEVLE                                           | SL <sup>4</sup> ENLMHHSE | ENPNQIRLLA               | QTLTDGGVMD | ELINEELET <sup>8</sup> F |
| dog         | GAE <sup>5</sup> E <sup>5</sup> IAEVLD               | SL <sup>4</sup> ENLMQHSE | DNP <sup>7</sup> NQIRILA | QTLTDGGVMD | ELINEELET <sup>8</sup> F |
| Consistency | *5***5***7                                           | *****4***                | 7*****8**                | *****      | *****                    |

|             | 1360       | 1370                     | 1380                     | 1390       | 1400       |
|-------------|------------|--------------------------|--------------------------|------------|------------|
| human       | NSRWRELHEE | AVRRQK <sup>7</sup> LLEQ | SIQSAQE <sup>5</sup> TEK | SLHLIQESLT | FIDKQLAAYI |
| mouse       | NSRWRELHEE | AVRKQK <sup>7</sup> LLEQ | SIQSAQEIEK               | SLHLIQESLE | FIDKQLAAYI |
| dog         | NSRWRELHEE | AVRRQK <sup>7</sup> LLEQ | SIQSAQEIEK               | SLHLIQESLS | SIDKQLAAYI |
| Consistency | *****      | ***7*****                | *****5**                 | *****4     | 4*****     |

|             | 1410       | 1420                     | 1430       | 1440                     | 1450                     |
|-------------|------------|--------------------------|------------|--------------------------|--------------------------|
| human       | ADKVDAAQMP | QEAQKI <sup>6</sup> QSDL | TSHEISLEEM | KKHNQ <sup>7</sup> GKEAA | Q <sup>6</sup> RVLSQIDVA |
| mouse       | TDKVDAAQMP | QEAQKI <sup>6</sup> QSDL | TSHEISLEEM | KKHNQ <sup>7</sup> GKDAN | Q <sup>6</sup> RVLSQIDVA |
| dog         | ADKVDAAQMP | QEAQKI <sup>6</sup> QSDL | TSHEISLEEM | KKHNQ <sup>7</sup> GKETA | Q <sup>6</sup> RVLSQIDVA |
| Consistency | 6*****     | *****                    | *****      | *****764                 | *****                    |

|             | 1460                     | 1470                     | 1480                     | 1490                     | 1500                     |
|-------------|--------------------------|--------------------------|--------------------------|--------------------------|--------------------------|
| human       | QK <sup>7</sup> KLQDVSMK | FRLFQK <sup>7</sup> PANF | EQRLQ <sup>7</sup> ESKMI | LDEVKMH <sup>7</sup> LPA | LET <sup>7</sup> KSVEQEV |
| mouse       | QK <sup>7</sup> KLQDVSMK | FRLFQK <sup>7</sup> PANF | EQRL <sup>7</sup> EESKMI | LDEVKMH <sup>7</sup> LPA | LET <sup>7</sup> KSVEQEV |
| dog         | QK <sup>7</sup> KLQDVSMK | FRLFQK <sup>7</sup> PANF | EQRLQ <sup>7</sup> ESKMI | LDEVKMH <sup>7</sup> LPA | LET <sup>7</sup> KSVEQEV |
| Consistency | *****                    | *****                    | ***7****                 | *****                    | *****                    |

|             | 1510                                   | 1520                     | 1530       | 1540                     | 1550       |
|-------------|----------------------------------------|--------------------------|------------|--------------------------|------------|
| human       | VQ <sup>9</sup> SQLN <sup>7</sup> HCVN | LYKSLSE <sup>7</sup> VKS | EVEMVIKTGR | QIVQKKQ <sup>7</sup> TEN | PKELDERVTA |
| mouse       | IQ <sup>9</sup> SQLSHCVN               | LYKSLSE <sup>7</sup> VKS | EVEMVIKTGR | QIVQKKQ <sup>7</sup> TEN | PKELDERVTA |
| dog         | VQ <sup>9</sup> SQLN <sup>7</sup> HCVN | LYKSLSE <sup>7</sup> VKS | EVEMVIKTGR | QIVQKKQ <sup>7</sup> TEN | PKELDERVTA |
| Consistency | 9****7****                             | *****                    | *****      | *****                    | *****      |

|             | 1560       | 1570                     | 1580       | 1590                     | 1600       |
|-------------|------------|--------------------------|------------|--------------------------|------------|
| human       | LKLHYNELGA | KVTERKQ <sup>6</sup> QLE | KCLKLSRKMR | KEMNVLTE <sup>6</sup> WL | AATDMELTKR |
| mouse       | LKLHYNELGA | KVTERKQ <sup>6</sup> QLE | KCLKLSRKMR | KEMNVLTE <sup>6</sup> WL | AATDTELTKR |
| dog         | LKLHYNELGA | KVTERKQ <sup>6</sup> QLE | KCLKLSRKMR | KEMNALTE <sup>6</sup> WL | AATDMELTKR |
| Consistency | *****      | *****                    | *****      | ***6****                 | ***5****   |

|             | 1610       | 1620       | 1630                     | 1640       | 1650                     |
|-------------|------------|------------|--------------------------|------------|--------------------------|
| human       | SAVEGMPSNL | DSEVAWGKAT | QKEIEKQ <sup>6</sup> KVH | LKSITEVGEA | LKT <sup>5</sup> VLGKKET |
| mouse       | SAVEGMPSNL | DSEVAWGKAT | QKEIEKQ <sup>6</sup> KAH | LKSVTELGES | LKM <sup>5</sup> VLGKKET |
| dog         | SAVEGMPSNL | DSEVAWGKAT | QKEIEKQ <sup>6</sup> KVH | LKSVTEVGEA | LKT <sup>5</sup> VLGKKEM |
| Consistency | *****      | *****      | *****6*                  | ***9**7**7 | **5*****5                |

|             | 1660       | 1670       | 1680       | 1690                     | 1700                     |
|-------------|------------|------------|------------|--------------------------|--------------------------|
| human       | LVEDKLSLLN | SNWIAVTSRA | EEWLNLLLEY | QKHMETF <sup>9</sup> DQN | VDHIT <sup>7</sup> KWIIQ |
| mouse       | LVEDKLSLLN | SNWIAVTSRV | EEWLNLLLEY | QKHMETF <sup>9</sup> DQN | IEQIT <sup>7</sup> KWIIH |
| dog         | LVEDKLSLLN | SNWIAVTSRA | EEWLNLLLEY | QKHMETF <sup>9</sup> DQN | VDYIT <sup>7</sup> NWIIQ |
| Consistency | *****      | *****6     | *****      | *****                    | 974**6***5               |

|             | 1710                     | 1720       | 1730       | 1740       | 1750       |
|-------------|--------------------------|------------|------------|------------|------------|
| human       | AD <sup>3</sup> TLLDESEK | KKPQQKEDVL | KRLKAELNDI | RPKVDSTRDQ | AANLMANRGD |
| mouse       | ADELLDESEK               | KKPQQKEDIL | KRLKAEMNDM | RPKVDSTRDQ | AAKLMANRGD |
| dog         | AD <sup>3</sup> ALLDESEK | KKPQQKEDIL | KRLKAEMNDI | RPKVDSTRDQ | AANLMANRGD |
| Consistency | **3*****                 | *****9*    | *****8**7  | *****      | **6*****   |

|             | 1760                     | 1770       | 1780       | 1790       | 1800        |
|-------------|--------------------------|------------|------------|------------|-------------|
| human       | HCRKLV <sup>7</sup> EPQI | SELNHRFAAI | SHRIKTGKAS | IPLKELEQFN | SDIQKLLLEPL |
| mouse       | HCRKVVEPQI               | SELNRRFAAI | SHRIKTGKAS | IPLKELEQFN | SDIQKLLLEPL |
| dog         | HCRKVVEPKI               | SELNHRFAAI | SHRIKTGKAS | IPLKELEQFN | SDIQKLLLEPL |
| Consistency | ****7***7*               | ****5***** | *****      | *****      | *****       |

|             | 1810       | 1820       | 1830       | 1840       | 1850       |
|-------------|------------|------------|------------|------------|------------|
| human       | EAEIQQGVNL | KEEDFNKDMN | EDNEGTVKEL | LQRGDNLQQR | ITDERKREEI |
| mouse       | EAEIQQGVNL | KEEDFNKDMS | EDNEGTVNEL | LQRGDNLQQR | ITDERKREEI |
| dog         | EAEIQQGVNL | KEEDFNKDMS | EDNEGTVKEL | LQRGDNLQQR | ITDERKREEI |
| Consistency | *****      | *****7     | *****6**   | *****      | *****      |

|             | 1860       | 1870       | 1880       | 1890       | 1900       |
|-------------|------------|------------|------------|------------|------------|
| human       | KIKQQLLQTK | HNALKDLRSQ | RRKKALEISH | QWYQYKRQAD | DLLKCLDDIE |
| mouse       | KIKQQLLQTK | HNALKDLRSQ | RRKKALEISH | QWYQYKRQAD | DLLKCLDEIE |
| dog         | KIKQQLLQTK | HNALKDLRSQ | RRKKALEISH | QWYQYKRQAD | DLLKCLDDIE |
| Consistency | *****      | *****      | *****      | *****      | *****7**   |

|             | 1910        | 1920       | 1930       | 1940       | 1950       |
|-------------|-------------|------------|------------|------------|------------|
| human       | KKLLASLPEPR | DERKIKEIDR | ELQKKKEELN | AVRRQAEGLS | EDGAAMAVEP |
| mouse       | KKLLASLPEPR | DERKIKEIDR | ELQKKKEELN | AVRRQAEGLS | ENGAAMAVEP |
| dog         | KKLLASLPEPR | DERKIKEIDR | ELQKKKEELN | AVRRQAEGLS | EDGAAMAVEP |
| Consistency | *****       | ****8***** | *****      | *****      | *6*****    |

|             | 1960       | 1970       | 1980       | 1990       | 2000       |
|-------------|------------|------------|------------|------------|------------|
| human       | TQIQLSKRWR | EIESKFAQFR | RLNFAQIHTV | REETMMVMTE | DMPLEISYVP |
| mouse       | TQIQLSKRWR | QIESNFAQFR | RLNFAQIHTL | HEETMVTTE  | DMPLDVSYVP |
| dog         | TQIQLSKRWR | EIESKFAQFR | RLNFAQIHTV | HEESVVAMTE | DMPLEISYVP |
| Consistency | *****      | 7***6***** | *****7     | 5**77765** | ****79**** |

|             | 2010       | 2020       | 2030       | 2040       | 2050       |
|-------------|------------|------------|------------|------------|------------|
| human       | STYLTEITHV | SQALLEVEQL | LNAPDLCAKD | FEDLFKQEEs | LKNIKDSLQQ |
| mouse       | STYLTEISHI | LQALSEVDHL | LNTPELCAKD | FEDLFKQEEs | LKNIKDNLQQ |
| dog         | STYLTEITHV | SQALSEVEEL | LNAPDLCAQD | FEDLFKQEEs | LKNIKDSLQQ |
| Consistency | *****7*9   | 5***5**74* | **6*7***7* | *****      | *****7***  |

|             | 2060                     | 2070                     | 2080       | 2090       | 2100       |
|-------------|--------------------------|--------------------------|------------|------------|------------|
| human       | S <sup>5</sup> SGRIDIIHS | KKTAALQ <sup>4</sup> SAT | PVERVKLQEA | LSQLDFQWEK | VNKMYKDRQG |
| mouse       | ISGRIDIIHK               | KKTAALQ <sup>5</sup> SAT | SMEKVKVQEA | VAQMDFQGEK | LHRMYKERQG |
| dog         | ISGRIDIIHN               | KKTAALHSAT               | PAERAKLQEA | LSRLDFQWER | VNNMYKDRQG |
| Consistency | 5*****4                  | *****5***                | 54*76*7*** | 7778***4*7 | 765***7*** |

|             | 2110       | 2120       | 2130       | 2140       | 2150       |
|-------------|------------|------------|------------|------------|------------|
| human       | RFDRSVEKWR | RFHYDIKIFN | QWLTEAEQFL | RKTQIPENWE | HAKYKWYLKE |
| mouse       | RFDRSVEKWR | HFHYDMKVFN | QWLNEVEQFF | KKTQNPENWE | HAKYKWYLKE |
| dog         | RFDRSVEKWR | RFHYDMKILN | QWLTEAEQFL | KKTQIPENWE | HAKYKWYLKE |
| Consistency | *****      | 5****7*96* | **6*6***6  | 7***4***** | *****      |

|             | 2160       | 2170       | 2180       | 2190       | 2200       |
|-------------|------------|------------|------------|------------|------------|
| human       | LQDGIGQRQT | VVRTLNATGE | EIIQQSSKTD | ASILQEKLGS | LNLRWQEVCK |
| mouse       | LQDGIGQRQA | VVRTLNATGE | EIIQQSSKTD | VNILEQEKLS | LSLRWHDIK  |
| dog         | LQDGIGQRQS | VVRVLNATGE | EIIQQSSKTD | ASILQEKLGS | LNLRWQEVCK |
| Consistency | *****5     | ***6*****  | *****      | 67*****    | *7***579** |

|             | 2210       | 2220       | 2230       | 2240       | 2250       |
|-------------|------------|------------|------------|------------|------------|
| human       | QLSDRKKRLE | EQKNILSEFQ | RDLNEFVLWL | EEADNIASIP | LEPGKEQQLK |
| mouse       | ELAERRKRLE | EQKNVLSEFQ | RDLNEFVLWL | EEADNIAIT- | -PLGDEQQLK |
| dog         | QLAERKKRLE | EQKNILSEFQ | RDVNEFVLWL | EEADNVANIP | LEPGNEQQLK |
| Consistency | 7*77*7**8* | ***9*****  | **7*****   | *****9*353 | 354*4***** |

|             | 2260       | 2270       | 2280       | 2290       | 2300        |
|-------------|------------|------------|------------|------------|-------------|
| human       | EKLEQVKLLV | EELPLRQGIL | KQLNETGGPV | LVSAPISPEE | QDKLENKLLKQ |
| mouse       | EQLEQVKLLA | EELPLRQGIL | KQLNETGGAV | LVSAPIRPEE | QDKLEKLLKQ  |
| dog         | EKLEQVKLLA | EELPLRQGIL | KQLNETGGTV | LVSAPLSPEE | QDKLENKLLKQ |
| Consistency | *7*****6   | *****      | *****3*    | *****85*** | *****6****  |

|             | 2310       | 2320       | 2330       | 2340       | 2350       |
|-------------|------------|------------|------------|------------|------------|
| human       | TNLQWIKVSR | ALPEKQGEIE | AQIKDLGQLE | KKLEDLEEQL | NHLLLWLSPI |
| mouse       | TNLQWIKVSR | ALPEKQGELE | VHLKDFRQLE | EQLDHLLLWL | SPIRNQLEIY |
| dog         | TNLQWIKVSR | NLPEKQEEIE | AHVKDLGQLE | EQLNHLLLWL | SPIRNQLEIY |
| Consistency | *****      | 4*****4*8* | 657**64*** | 77*55*444* | 748444*645 |

|             | 2360        | 2370        | 2380       | 2390       | 2400        |
|-------------|-------------|-------------|------------|------------|-------------|
| human       | RNQLLEIYNQP | NQEGPFDVQE  | TEIAVQAKQP | DVEEILSKGQ | HLYKEKPATQ  |
| mouse       | NQPS-----   | -QAGPFDIKE  | IEVTVHGKQA | DVERLLSKGQ | HLYKEKPS TQ |
| dog         | NQPN-----   | -QTGPFDIKE  | IEVAVQAKQP | DVEGILSKGQ | HLYKEKPATQ  |
| Consistency | 6653000000  | 0*3*****97* | 5*96*56**5 | ***28***** | *****7**    |

|             | 2410       | 2420       | 2430       | 2440       | 2450       |
|-------------|------------|------------|------------|------------|------------|
| human       | PVKKKLEDLS | SEWKAVNRL  | QELRAKQPD  | APGLTTIGAS | PTQTVTLVTQ |
| mouse       | PVKKKLEDLR | SEWEAVNHLL | RELRTKQPD  | APGLSTTGAS | ASQTVTLVTQ |
| dog         | PAKKKLEDLS | SDWKVVTQL  | QELRAKQGP  | APGLTTVRAP | PSQTVTLVTQ |
| Consistency | *6*****5   | *7*76*64** | 7***6***51 | ***7*54*5  | 57*****    |

|             | 2460       | 2470       | 2480       | 2490      | 2500       |
|-------------|------------|------------|------------|-----------|------------|
| human       | PVVTKETAI  | KLEMPSSLML | EVPALADFNR | AWTELDWLS | LLDQVIKSQR |
| mouse       | SVVTKETVIS | KLEMPSSLLL | EVPALADFNR | AWTELDWLS | LLDRVIKSQR |
| dog         | PAVTKETAI  | KLEMPSSLLL | EVPALADFNR | AWTELDWLS | LLDRVIKSQR |
| Consistency | 56*****6** | *****8*    | *****      | *****     | ***7*****  |

|             | 2510        | 2520       | 2530       | 2540       | 2550       |
|-------------|-------------|------------|------------|------------|------------|
| human       | VMVGDLIEDIN | EMIIKQKATM | QDLEQRRPQL | EELITAAQNL | KNKTSNQEAR |
| mouse       | VMVGDLIEDIN | EMIIKQKATL | QDLEQRRPQL | EELITAAQNL | KNKTSNQEAR |
| dog         | VMVGDLIEDIN | EMIIKQKATL | QDLEQRRPQL | EELITAAQNL | KNKTSNQEAR |
| Consistency | *****       | *****8     | *****      | *****      | *****      |

|             | 2560       | 2570       | 2580        | 2590       | 2600       |
|-------------|------------|------------|-------------|------------|------------|
| human       | TIITDRIERI | QNQWDEVQEH | LQNRRLQQLNE | MLKDSTQWLE | AKEEAEQVLG |
| mouse       | TIITDRIERI | QIQWDEVQEQ | LQNRRLQQLNE | MLKDSTQWLE | AKEEAEQVIG |
| dog         | TIITDRIERI | QSQWDEVQEH | LQNRRLQLTE  | MLKDSTQWLE | AKEEAEQVLG |
| Consistency | *****      | *3*****5   | *****4**6*  | *****      | *****8*    |

|             | 2610       | 2620       | 2630       | 2640       | 2650       |
|-------------|------------|------------|------------|------------|------------|
| human       | QARAKLESWK | EGPYTVDAIQ | KKITETKQLA | KDLRQWQTNV | DVANDLALKL |
| mouse       | QVRGKLDLWK | EGPHTVDAIQ | KKITETKQLA | KDLRQRQISV | DVANDLALKL |
| dog         | QARAKLESWK | EAPYTVDAIQ | KKITETKQLA | KDLRQWQINV | DVANDLALKL |
| Consistency | *6*6**7*** | *6*6*****  | *****      | *****3*57* | *****      |

|             | 2660       | 2670       | 2680       | 2690       | 2700       |
|-------------|------------|------------|------------|------------|------------|
| human       | LRDYSADDTR | KVHMITENIN | ASWRSIHKRV | SEREAALEET | HRLQQQFPLD |
| mouse       | LRDYSADDTR | KVHMITENIN | TSWGNIHKRV | SEQEAALEET | HRLQQQFPLD |
| dog         | LRDYSADDTR | KVHMITENIN | ASWASIHKRL | SEREAALEET | HRLQQQFPLD |
| Consistency | *****      | *****      | 6**37***7  | **7*****   | *****      |

|             | 2710       | 2720       | 2730       | 2740       | 2750       |
|-------------|------------|------------|------------|------------|------------|
| human       | LEKFLAWLTE | AETTANVLQD | ATRKERLLED | SKGVKELMKQ | WQDLQGEIEA |
| mouse       | LEKFLSWITE | AETTANVLQD | ASRKEKLED  | SRGVRELMKP | WQDLQGEIET |
| dog         | LEKFLAWLTE | AETTANVLQD | ATHKERLLED | SKGVRELMKQ | WQDLQGEIEA |
| Consistency | *****7*8** | *****      | *75**7**** | *7**7****5 | *****6     |

|             | 2760       | 2770       | 2780       | 2790       | 2800       |
|-------------|------------|------------|------------|------------|------------|
| human       | HTDVYHNLDE | NSQKILRSLE | GSDDAVLLQR | RLDNMNFKWS | ELRKKSLNIR |
| mouse       | HTDIYHNLDE | NGQKILRSLE | GSDEAPLLQR | RLDNMNFKWS | ELQKKSLNIR |
| dog         | HTDIYHNLDE | NGQKVLRSLE | GSDDAALLQR | RLDNMNFKWS | ELRKKSLNIR |
| Consistency | **9*****   | *6**9***** | **7*3****  | *****      | **7*****   |

|             | 2810       | 2820       | 2830       | 2840       | 2850       |
|-------------|------------|------------|------------|------------|------------|
| human       | SHLEASSDQW | KRLHLSLQEL | LVWLQLKDDE | LSRQAPIGGD | FPAVQKQNDV |
| mouse       | SHLEASSDQW | KRLHLSLQEL | LVWLQLKDDE | LSRQAPIGGD | FPAVQKQNDI |
| dog         | SHLEASSDQW | KRLHLSLQEL | LVWLQLKDDE | LSRQAPIGGD | FPAVQKQNDV |
| Consistency | *****      | *****      | *****      | *****      | *****9     |

|             | 2860       | 2870       | 2880       | 2890       | 2900       |
|-------------|------------|------------|------------|------------|------------|
| human       | HRAFKRELKT | KEPVIMSTLE | TVRIFLTEQP | LEGLEKLYQE | PRELPPEERA |
| mouse       | HRAFKRELKT | KEPVIMSTLE | TVRIFLTEQP | LEGLEKLYQE | PRELPPEERA |
| dog         | HRAFKRELKT | KEPVIMSTLE | TVRIFLTEQP | LEGLEKLYQE | PRELPPEERA |
| Consistency | *****      | *****      | *****      | *****      | *****      |

|             | 2910     | 2920       | 2930       | 2940       | 2950       |
|-------------|----------|------------|------------|------------|------------|
| human       | QNVTRLRQ | AEEVNTWEK  | LNLHSADWQR | KIDETLERLQ | ELQEATDELD |
| mouse       | QNVTRLRQ | AEEVNAEWDK | LNLRSADWQR | KIDEALERLQ | ELQEAADELD |
| dog         | QNVTRLRQ | AEEVNTQWEK | LNVHSADWQR | KIDEALERLQ | ELQEATDELD |
| Consistency | *****    | *****67*7* | **75*****  | ****6***** | *****6**** |

|             | 2960       | 2970       | 2980       | 2990       | 3000       |
|-------------|------------|------------|------------|------------|------------|
| human       | LKLRQAEVIK | GSWQPVGDLL | IDSLQDHLEK | VKALRGEIAP | LKENVSHVND |
| mouse       | LKLRQAEVIK | GSWQPVGDLL | IDSLQDHLEK | VKALRGEIAP | LKENVNRVND |
| dog         | LKLRQAEVIK | GSWQPVGDLL | IDSLQDHLEK | VKALRGEITP | LKENVSYVND |
| Consistency | *****      | *****      | *****      | *****6*    | *****73*** |

|             | 3010        | 3020       | 3030       | 3040       | 3050       |
|-------------|-------------|------------|------------|------------|------------|
| human       | LARQLTTLGI  | QLSPYNLSTL | EDLNTRWKLL | QVAVEDRVRQ | LHEAHRDFGP |
| mouse       | LAHQTLTTLGI | QLSPYNLSTL | EDLNTRWRLL | QVAVEDRVRQ | LHEAHRDFGP |
| dog         | LARQLTTLGI  | QLSPYNLNTL | EDLNTRWKLL | QVAIEDRIRQ | LHEAHRDFGP |
| Consistency | **5*****    | *****7**   | *****7**   | **9**9**   | *****      |

|             | 3060       | 3070       | 3080       | 3090        | 3100       |
|-------------|------------|------------|------------|-------------|------------|
| human       | ASQHFLSTSV | QGPWERAISP | NKVPYYINHE | TQTTTCWDHPK | MTELYQSLAD |
| mouse       | ASQHFLSTSV | QGPWERAISP | NKVPYYINHE | TQTTTCWDHPK | MTELYQSLAD |
| dog         | ASQHFLSTSV | QGPWERAISP | NKVPYYINHE | TQTTTCWDHPK | MTELYQSLAD |
| Consistency | *****      | *****      | *****      | *****       | *****      |

|             |                                                          |
|-------------|----------------------------------------------------------|
|             | ..... 3110..... 3120..... 3130..... 3140..... 3150       |
| human       | LNNVRFSAAYR TAMKLRRRLQK ALCLDLLSLS AACDALDQHN LKQNDQPMDI |
| mouse       | LNNVRFSAAYR TAMKLRRRLQK ALCLDLLSLS AACDALDQHN LKQNDQPMDI |
| dog         | LNNVRFSAAYR TAMKLRRRLQK ALCLDLLSLS AACDALDQHN LKQNDQPMDI |
| Consistency | *****                                                    |

|             |                                                        |
|-------------|--------------------------------------------------------|
|             | ..... 3160..... 3170..... 3180..... 3190..... 3200     |
| human       | LQIINCLTTI YDRLEQEHNN LVNVPLCVDM CLNWLLNVYD TGRTGRIRVL |
| mouse       | LQIINCLTTI YDRLEQEHNN LVNVPLCVDM CLNWLLNVYD TGRTGRIRVL |
| dog         | LQVINCLTTI YDRLEQEHNN LVNVPLCVDM CLNWLLNVYD TGRTGRIRVL |
| Consistency | **9*****                                               |

|             |                                                         |
|-------------|---------------------------------------------------------|
|             | ..... 3210..... 3220..... 3230..... 3240..... 3250      |
| human       | SFKTGIISLC KAHLEDKYRY LFKQVASSTG FCDQRRLLGLL LHDSIQIPRQ |
| mouse       | SFKTGIISLC KAHLEDKYRY LFKQVASSTG FCDQRRLLGLL LHDSIQIPRQ |
| dog         | SFKTGIISLC KAHLEDKYRY LFKQVASSTG FCDQRRLLGLL LHDSIQIPRQ |
| Consistency | *****                                                   |

|             |                                                        |
|-------------|--------------------------------------------------------|
|             | ..... 3260..... 3270..... 3280..... 3290..... 3300     |
| human       | LGEVASFGGS NIEPSVRSCF QFANNKPEIE AALFLDWMRL EPQSMVWLPV |
| mouse       | LGEVASFGGS NIEPSVRSCF QFANNKPEIE AALFLDWMRL EPQSMVWLPV |
| dog         | LGEVASFGGS NIEPSVRSCF QFANNKPEIE AALFLDWMRL EPQSMVWLPV |
| Consistency | *****                                                  |

|             |                                                        |
|-------------|--------------------------------------------------------|
|             | ..... 3310..... 3320..... 3330..... 3340..... 3350     |
| human       | LHRVAAAETA KHQAKCNICK ECPIIGFRYR SLKHFNYDIC QSCFFSGRVA |
| mouse       | LHRVAAAETA KHQAKCNICK ECPIIGFRYR SLKHFNYDIC QSCFFSGRVA |
| dog         | LHRVAAAETA KHQAKCNICK ECPIIGFRYR SLKHFNYDIC QSCFFSGRVA |
| Consistency | *****                                                  |

|             |                                                        |
|-------------|--------------------------------------------------------|
|             | ..... 3360..... 3370..... 3380..... 3390..... 3400     |
| human       | KGHKMHYPMV EYCTPTTSGE DVRDFAKVLK NKFRTKRYFA KHPRMGYLPV |
| mouse       | KGHKMHYPMV EYCTPTTSGE DVRDFAKVLK NKFRTKRYFA KHPRMGYLPV |
| dog         | KGHKMHYPMV EYCTPTTSGE DVRDFAKVLK NKFRTKRYFA KHPRMGYLPV |
| Consistency | *****                                                  |

|             |                                                         |
|-------------|---------------------------------------------------------|
|             | ..... 3410..... 3420..... 3430..... 3440..... 3450      |
| human       | QTVLEGDNME TPVTLINEFWP VDSAPASSPQ LSHDDTHSRI EHYASRLAEM |
| mouse       | QTVLEGDNME TPVTLINEFWP VDSAPASSPQ LSHDDTHSRI EHYASRLAEM |
| dog         | QTVLEGDNME TPVTLINEFWP VDSAPASSPQ LSHDDTHSRI EHYASRLKKM |
| Consistency | *****57*                                                |

|             |                                                        |
|-------------|--------------------------------------------------------|
|             | ..... 3460..... 3470..... 3480..... 3490..... 3500     |
| human       | ENSNGSYLND SISPNESIDD EHLLIQHYCQ SLNQDSPLSQ PRSPAQILIS |
| mouse       | ENSNGSYLND SISPNESIDD EHLLIQHYCQ SLNQDSPLSQ PRSPAQILIS |
| dog         | ENSNGSYLND SISPNESIDD EHLLIQHYWR SLNQESPLSQ PRSPAQILIS |
| Consistency | *****47****7*****                                      |

|             |                                                        |
|-------------|--------------------------------------------------------|
|             | ..... 3510..... 3520..... 3530..... 3540..... 3550     |
| human       | LESEERGELE RILADLEEN RNLQAEYDRL KQQHEHKGLS PLPSPPEMMP  |
| mouse       | LESEERGELE RILADLEEN RNLQAEYDRL KQQHEHKGLS PLPSPPEMMP  |
| dog         | LESEERGELE RILADLEGRN RNLQAEYDRL KQQHEHKGLS PLPSPPEMMP |
| Consistency | *****46*****                                           |



|             |            |            |            |            |            |      |       |      |       |      |
|-------------|------------|------------|------------|------------|------------|------|-------|------|-------|------|
|             | .....      | 3560       | .....      | 3570       | .....      | 3580 | ..... | 3590 | ..... | 3600 |
| human       | TSPQSPRDAE | LIAEAKLLRQ | HKGRLEARMQ | ILEDHMKQLE | SQLHRLRQLL |      |       |      |       |      |
| mouse       | TSPQSPRDAE | LIAEAKLLRQ | HKGRLEARMQ | ILEDHMKQLE | SQLHRLRQLL |      |       |      |       |      |
| dog         | TSPQSPRDAE | LIAEAKLLRQ | HKGRLEARMQ | ILEDHMKQLE | SQLHRLRQLL |      |       |      |       |      |
| Consistency | *****      | *****      | *****      | *****      | *****      |      |       |      |       |      |

  

|             |            |            |            |            |            |       |       |      |       |      |
|-------------|------------|------------|------------|------------|------------|-------|-------|------|-------|------|
|             | .....      | 3610       | .....      | 3620       | .....      | 3630  | ..... | 3640 | ..... | 3650 |
| human       | EQPQAEAKVN | GTTVSSPSTS | LQRSDSSQPM | LLRVVGSQTS | DSMGEEDLLS |       |       |      |       |      |
| mouse       | EQPQAEAKVN | GTTVSSPSTS | LQRSDSSQPM | LLRVVGSQTS | ESMGEEDLLS |       |       |      |       |      |
| dog         | EQPQAEAKVN | GTTVSSPSTS | LQRSDSSQPM | LLRVVGSQTS | ESMGEEDLLS |       |       |      |       |      |
| Consistency | *****      | *****      | *****      | *****      | 7          | ***** |       |      |       |      |

  

|             |            |            |            |          |       |      |       |
|-------------|------------|------------|------------|----------|-------|------|-------|
|             | .....      | 3660       | .....      | 3670     | ..... | 3680 | ..... |
| human       | PPQDTSTGLE | EVMEQLNNSF | PSSRGRNTPG | KPMREDTM |       |      |       |
| mouse       | PPQDTSTGLE | EVMEQLNNSF | PSSRGRNAPG | KPMREDTM |       |      |       |
| dog         | PPQDTSTGLE | EVMEQLNHSF | PSSRGRNTPG | KPMREDTM |       |      |       |
| Consistency | *****      | *****6**   | *****6**   | *****    |       |      |       |

**Supplementary Fig. 1.** Aligned human, mouse and dog *DMD* protein sequences, color-coded to indicate sequence conservation. The alignment and conservation scoring were performed by PRALINE [157]. Conservation scores range from 0 for the least conserved alignment position, up to 10 for the most conserved alignment position.
